# Supplementary material for: Systemic Delivery of scAAV8-Encoded MiR-29a Ameliorates Hepatic Fibrosis in Carbon Tetrachloride-Treated Mice
Source: PubMed Central journal article supplement (PMC4414421; doi:10.1371/journal.pone.0124411), 2015-04-29

# S1 Fig.

**a**

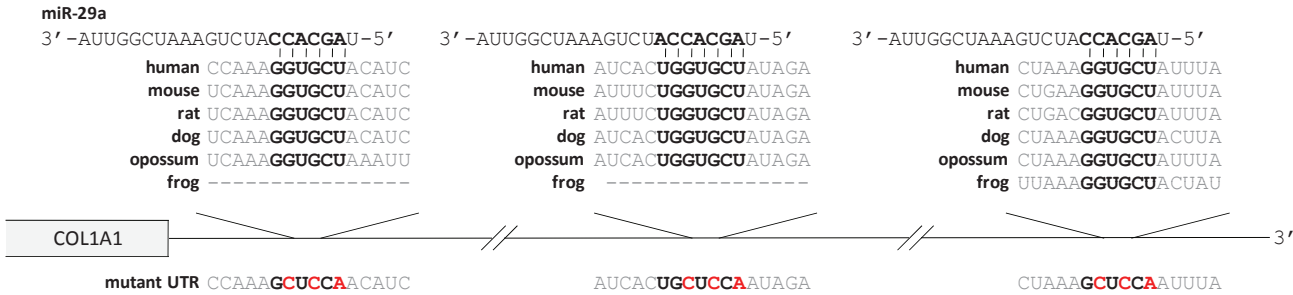

**b**

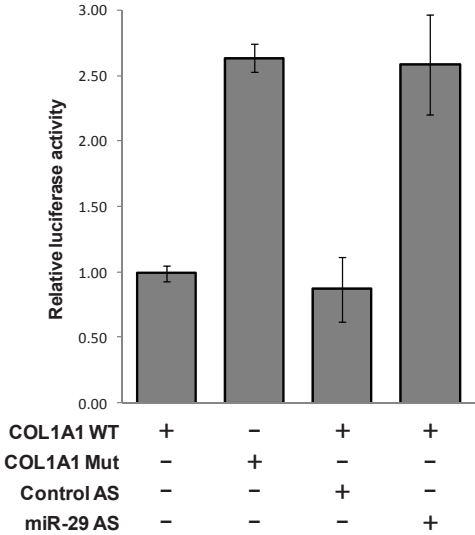

**c**

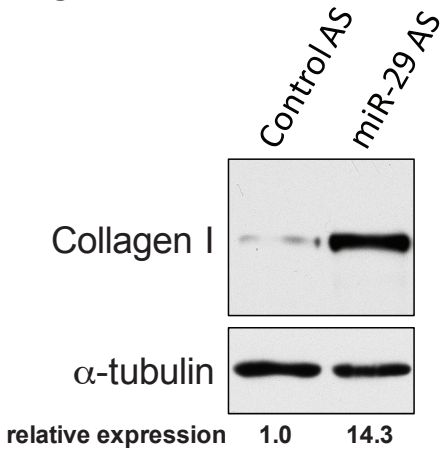

Supplement: pone.0124411.s001.pdf [file pone.0124411.s001.pdf]
